# Supplementary material for: Diagnostic Usefulness of Varicella-Zoster Virus Real-Time Polymerase Chain Reaction Analysis of DNA in Saliva and Plasma Specimens From Patients With Herpes Zoster
Source: Oxford University Press journal article supplement (doi:10.1093/infdis/jix508), 2017-09-19
Supplement: jix508_suppl_supplementary_tables.doc [file jix508_suppl_supplementary_tables.doc]

**Supplementary Table 1. Characteristics of patients with herpes zoster and their salivary and plasma varicella-zoster virus (VZV) DNA loads.**

| Patient | Underlying disease | Zoster site | Days of pain before sample collection | Days of rash before sample collection | Timing of sample collection | Vesicle PCR  Test (performed/result) | VZV DNA load a | |
| --- | --- | --- | --- | --- | --- | --- | --- | --- |
| Saliva | plasma |
| 1 (27/F) | None | V1, meningitis | 8 | 3 | D1 | (+)/(+) | 2.48 | ND |
| 2 (32/M) | None | V1 | 10 | 8 | D8 | (+)/(+) | ND | ND |
| 3 (38/F) | None | V1 | 3 | 1 | D1 | (-) | 2.91 | ND |
| 4 (39/M) | None | V1 | 2 | 1 | D1 | (-) | 3.05 | ND |
| 5 (41/M) | Bladder cancer | V1 | 6 | 4 | D4 | (-) | 2.95 | ND |
| 6 (46/F) | None | V1 | 7 | 2 | D1 | (-) | 2.29 | ND |
| 7 (46/F) | None | V1 | 1 | 1 | D1 | (-) | 1.56 | ND |
| 8 (54/F) | Breast cancer | V1 | 5 | 4 | D4 | (+)/(+) | 1.79 | ND |
| 9 (55/F) | Renal transplantation | V1 | 7 | 5 | D4 | (-) | 1.88 | ND |
| 10 (56/F) | None | V1 | 4 | 2 | D1 | (-) | 3.01 | ND |
| 11 (58/F) | Lymphoma | V1 | 1 | 3 | D3 | (+)/(+) | 3.82 | 1.34 |
| 12 (66/M) | None | V1 | 15 | 3 | D1 | (-) | 2.11 | ND |
| 13 (69/M) | DM | V1 | 5 | 4 | D1 | (-) | 4.19 | ND |
| 14 (86/M) | DM | V1 | 3 | 1 | D1 | (-) | 7.33 | ND |
| 15 (53/F) | Endometrial cancer | V2 | 7 | 4 | D4 | (+)/(-) | 2.25 | ND |
| 16 (44/M) | None | VII | 7 | 2 | D1 | (-) | 5.48 | ND |
| 17 (52/M) | None | VII, RHS | 3 | 1 | D1 | (-) | 2.36 | ND |
| 18 (56/M) | None | C3-C4 | 9 | 7 | D4 | (-) | 3.60 | ND |
| 19 (76/M) | Lymphoma | C3-C4 |  | 5 | D1 | (+)/(+) | 3.43 | 1.81 |
| 20 (28/M) | None | C3-C5 | 7 | 3 | D1 | (+)/(+) | 2.52 | 2.15 |
| 21 (45/M) | DM, Lupus | C5-C6 | 14 | 7 | D6 | (-) | 3.12 | ND |
| 22 (60/M) | None | C6 | 2 | 2 | D1 | (-) | 1.65 | ND |
| 23 (55/M) | DM | C6 | 3 | 1 | D1 | (-) | 2.59 | 1.50 |
| 24 (23/M) | None | C7 | 18 | 9 | D9 | (-) | 1.58 | ND |
| 25 (55/M) | Sarcoma | T1 | 12 | 9 | D7 | (-) | 1.54 | ND |
| 26 (54/F) | None | T1-T3 | 4 | 4 | D1 | (-) | 3.05 | 1.48 |
| 27 (73/M) | None | T1-T3 | 2 | 1 | D1 | (-) | ND | 1.65 |
| 28 (83/M) | None | T3-T5, meningitis | 17 | 8 | D8 | (-) | 2.11 | ND |
| 29 (49/F) | Trigeminal neuralgia | T4 | 10 | 5 | D1 | (-) | 2.76 | ND |
| 30 (53/M) | DM | T4-T5 | 5 | 2 | D1 | (-) | ND | 1.54 |
| 31 (34/M) | Pancreas transplantation | T5 | 2 | 2 | D4 | (+)/(+) | 2.50 | ND |
| 32 (75/F) | Renal cell carcinoma | T7-T9 | 2 | 1 | D4 | (-) | 1.73 | ND |
| 33 (55/M) | None | T10 | 4 | 2 | D1 | (-) | 2.18 | ND |
| 34 (53/M) | None | T11-T12 | 7 | 4 | D1 | (-) | 2.53 | ND |
| 35 (40/F) | None | T12-L13 | 3 | 1 | D1 | (-) | 1.86 | ND |
| 36 (71/F) | Raynaud’s syndrome | L2-L3 | 7 | 4 | D1 | (-) | 3.18 | 2.75 |
| 37 (40/M) | Renal transplantation | L4 | 4 | 3 | D3 | (+)/(+) | ND | 1.69 |
| 38 (61/F) | None | L4 | 3 | 1 | D1 | (-) | 2.44 | ND |
| 39 (44/M) | None | L4-L5 | 7 | 3 | D1 | (-) | 1.87 | 1.55 |
| 40 (66/M) | Renal transplantation | L5 | 7 | 1 | D3 | (+)/(+) | 2.63 | ND |
| 41 (34/F) | Stem cell transplantation | S1-S2 | No pain | 3 | D5 | (+)/(+) | 0.74 | ND |
| 42(50/M) | Lymphoma | S1-S2 | 5 | 3 | D3 | (-) | ND | 2.89 |
| 43 (53/M) | Renal transplantation | S2-S3 | 10 | 8 | D8 | (+)/(+) | ND | ND |
| 44 (72/F) | None | S2-S3 | 7 | 4 | D1 | (-) | 1.83 | ND |
| 45 (55/F) | stem cell transplantation | Disseminated | 7 | 5 | D4 | (+)/(+) | 5.73 | 3.47 |
| 46 (65/F) | Lupus, DM | Disseminated | No pain | 5 | D2 | (+)/(+) | 5.14 | 2.32 |
| 47 (35/F) | None | V1 | 2 | 2 | D1 | (-) | 1.50 | Not collected |
| 48 (61/F) | HTN | V1 | 14 | 3 | D1 | (-) | 2.36 | Not collected |
| 49 (60/M) | None | C2-C3 | 7 | 5 | D3 | (-) | 1.59 | Not collected |
| 50 (34/M) | None | S2-S3 | 6 | 3 | D2 | (-) | 1.48 | Not collected |
| 51 (47/F) | Renal transplantation, DM, HTN | Disseminated | No pain | 11 | D7 | (+)/(+) | 5.68 | Not collected |
| 52 (58/F) | Breast cancer | Disseminated | 5 | 4 | D1 | (+)/(+) | 5.14 | Not collected |

a VZA DNA load is presented as log copies/mL of saliva.

VZV, varicella zoster virus; RHS, Ramsay Hunt syndrome;DM, diabetes mellitus. ND, not detected. Day 1 was defined as the day that treatment started.

**Supplementary Table 2. Comparison of clinical and laboratory characteristic by site of zoster a**

| **Variables** | **Cranial nerve involvement (n=19)** | **Non-cranial nerve involvement (n=29)** | ***P* value** |
| --- | --- | --- | --- |
| **Age** | 50.4 ± 14.3 | 53.5 ± 15.2 | .48 |
| **Male Sex** | 11/19 (58) | 18/29 (62) | .14 |
| **Immunocompromised** | 2/19 (11) | 10/29 (35) | .06 |
| **Saliva VZV DNA positive** | 18/19 (95) | 24/29 (83) | .22 |
| **Saliva VZV DNA load b** | 2.81 ± 1.56 | 1.88 ± 1.08 | .02 |
| **Plasma VZV DNA** | 1/17 (6) | 10/27 (37) | .02 |
| **Plasma VZV DNA load b** | 0.07 ± 0.32 | 0.68 ± 0.97 | .004 |
| **Variables** | **V1 involvement (n=15)** | **Non-V1 involvement (n=33)** | ***P* value** |
| **Age** | 51.6 ± 15.5 | 52.6 ± 14.7 | .83 |
| **Male Sex** | 9/15 (60) | 13/33 (39) | .16 |
| **Immunocompromised** | 2/15 (13) | 10/33 (30) | .19 |
| **Saliva VZV DNA positive** | 14/15 (93) | 28/33 (85) | .38 |
| **Saliva VZV DNA load b** | 2.8 ± 1.6 | 2.0 ± 1.2 | .07 |
| **Plasma VZV DNA positive** | 1/15 (7) | 10/31 (32) | .06 |
| **Plasma VZV DNA load b** | 0.09 ± 0.35 | 0.61 ± 0.95 | .009 |

a Four patients with disseminated zoster was not included in this analysis.

**b** VZA DNA load is presented as log copies/mL of saliva and plasma
